# Supplementary material
Source: PubMed Central journal article supplement (PMC3259203)
Supplement: NIHMS339478-supplement-1_si_001.pdf [file NIHMS339478-supplement-1_si_001.pdf]

## Supporting Information

### Exploring the Surface Sensitivity of ToF-SIMS by Measuring the Implantation Depths and Sampling Depths of $\text{Bi}_n$ and $\text{C}_{60}$ Ions in Organic Films

Shin Muramoto,<sup>1,3</sup> Jeremy Brison,<sup>1,2</sup> David G. Castner<sup>1-3, §</sup>

National ESCA and Surface Analysis Center for Biomedical Problems<sup>1</sup>  
Departments of Bioengineering<sup>2</sup> and Chemical Engineering,<sup>3</sup> University of Washington,  
Seattle, WA 98195

§ Corresponding author

David G. Castner

1-206-543-8094 (phone)

1-206-543-3778 (fax)

castner@nb.engr.washington.edu (e-mail)

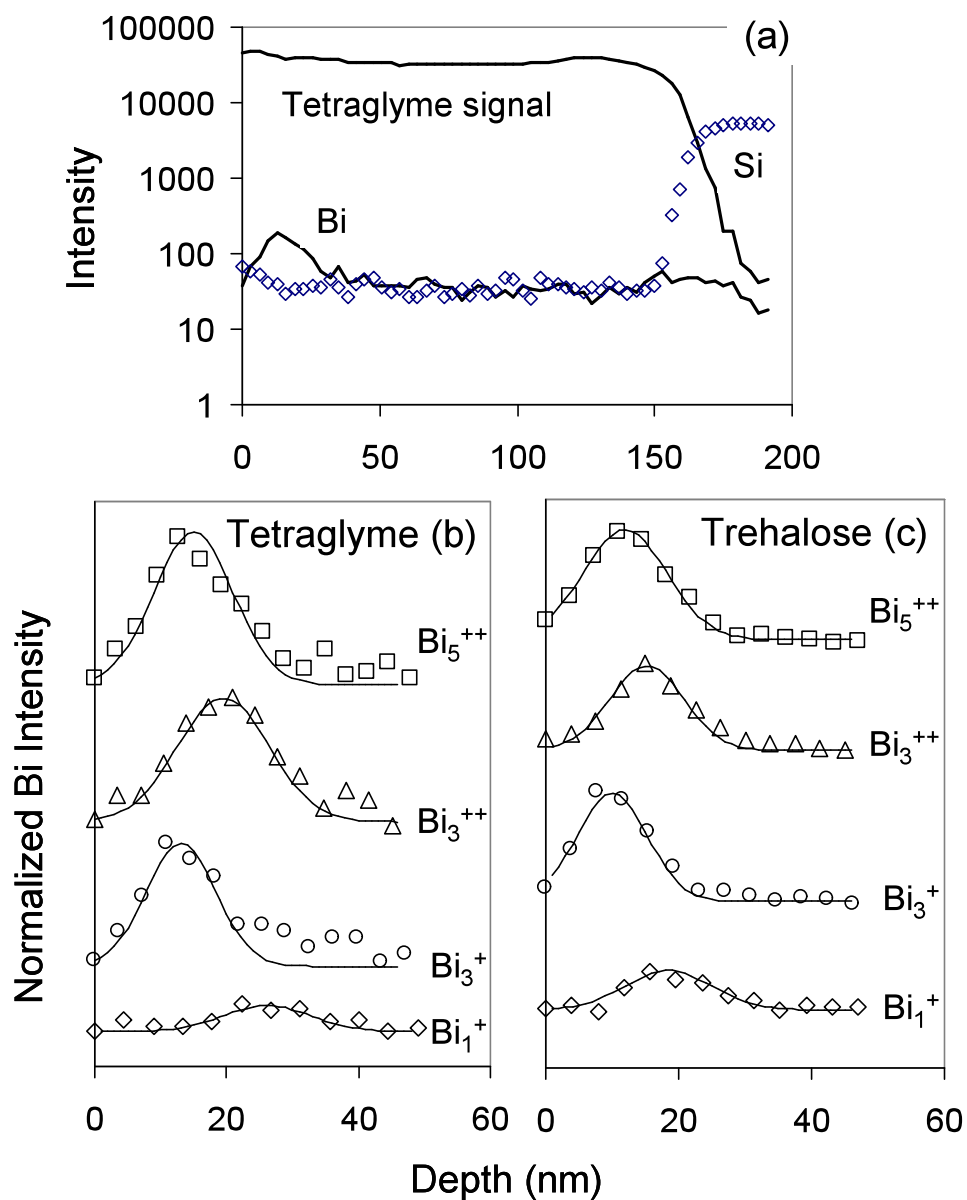

Figure S-1. (a) An example of a  $C_{60}^+$  single-beam depth profile of an implanted tetraglyme film showing the signal intensities related to the tetraglyme film, implanted bismuth and silicon substrate. Bismuth intensity depth profiles obtained for  $Bi_1^+$ ,  $Bi_3^+$ ,  $Bi_3^{++}$ , and  $Bi_5^{++}$  implanted (b) tetraglyme and (c) trehalose films. A gaussian peak has been fit to each bismuth profile. The bismuth signals (offset) are normalized to the number of incident  $C_{60}$  ions.

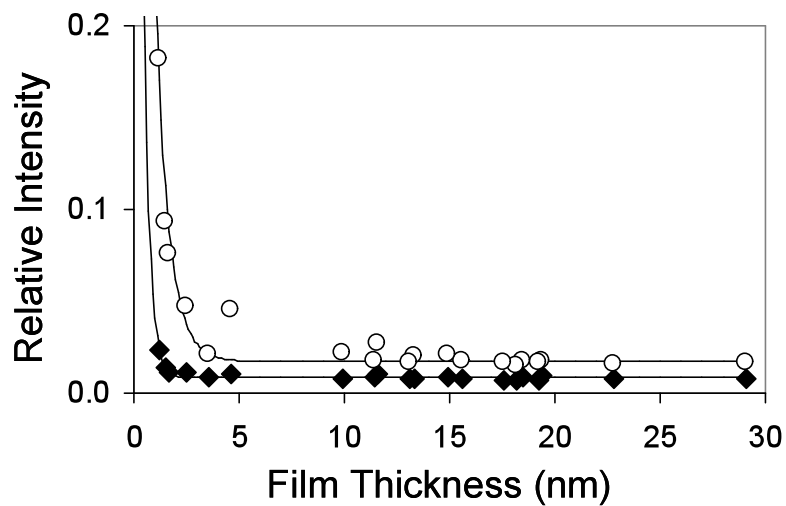

Figure S-2. The relative intensity of the secondary ion  $C_4H_8N^+$  at  $m/z$  70 versus tetraglyme overlayer thickness for  $Bi_1^+$  ( $\blacklozenge$ ) and  $Bi_3^+$  (O) primary ions. The data points obtained using  $Bi_3^{++}$ ,  $Bi_5^{++}$ , and  $C_{60}^{++}$  primary ions were not included for ease of viewing.
